# Supplementary material
Source: PubMed Central journal article supplement (PMC3795494)

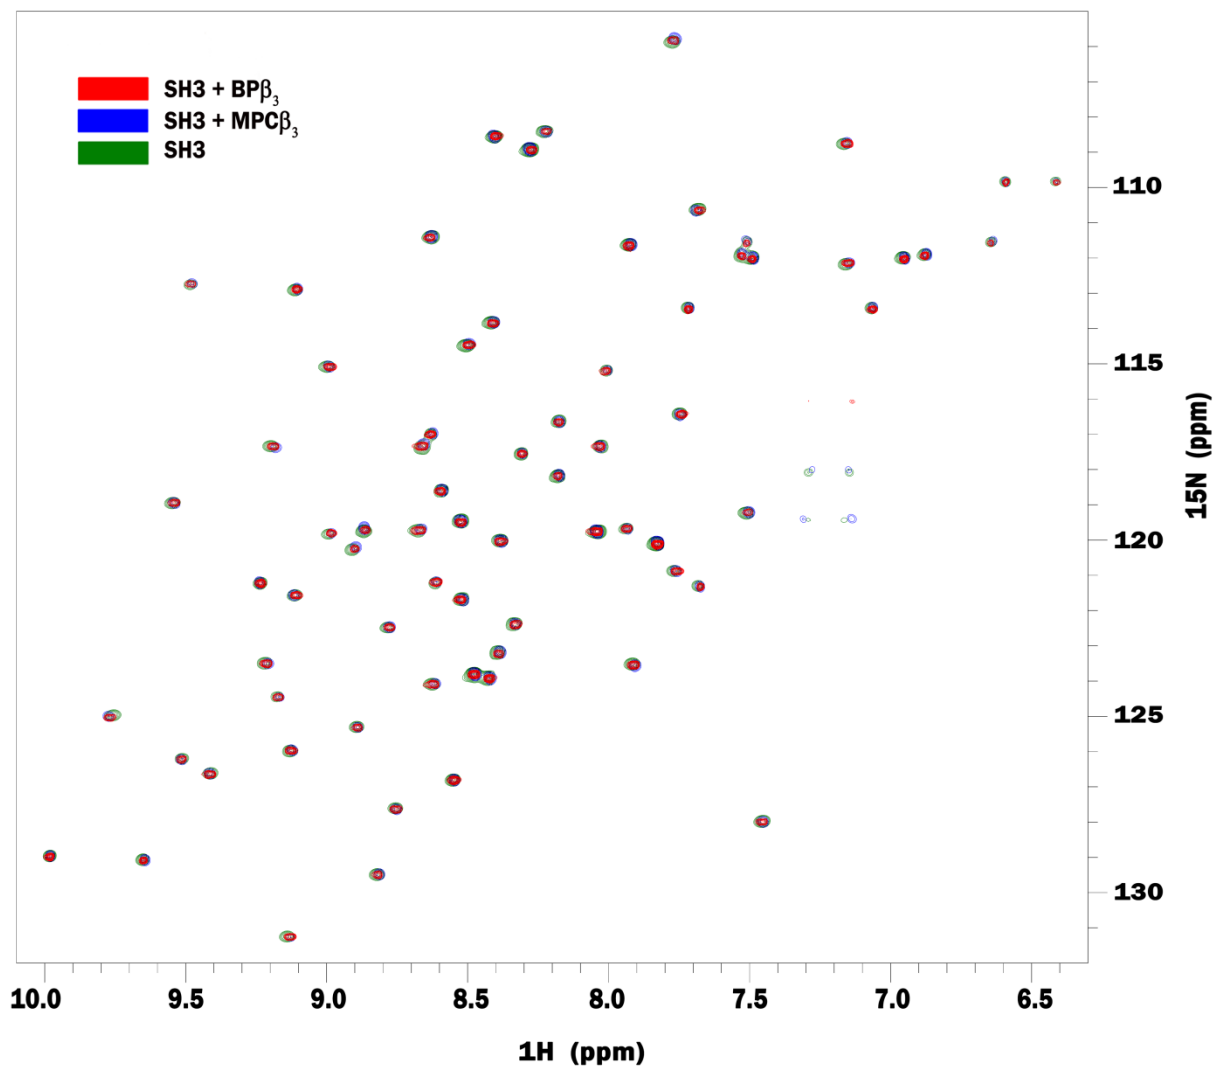

Supplementary Figure 1.

Supplement: pro0022-1358-SD1.pdf [file pro0022-1358-SD1.pdf]

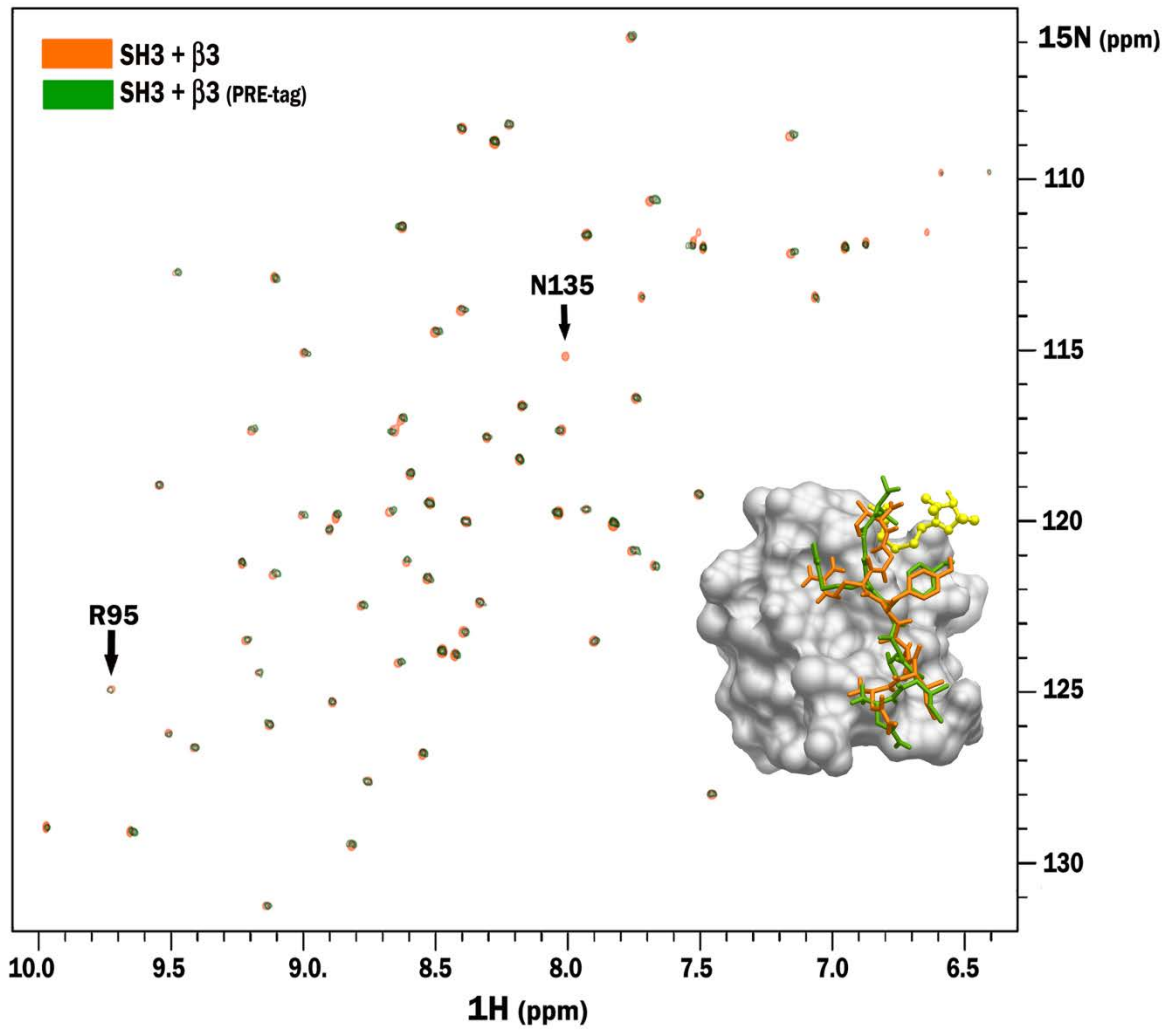

Supplementary Figure 2.

Supplement: pro0022-1358-SD2.pdf [file pro0022-1358-SD2.pdf]

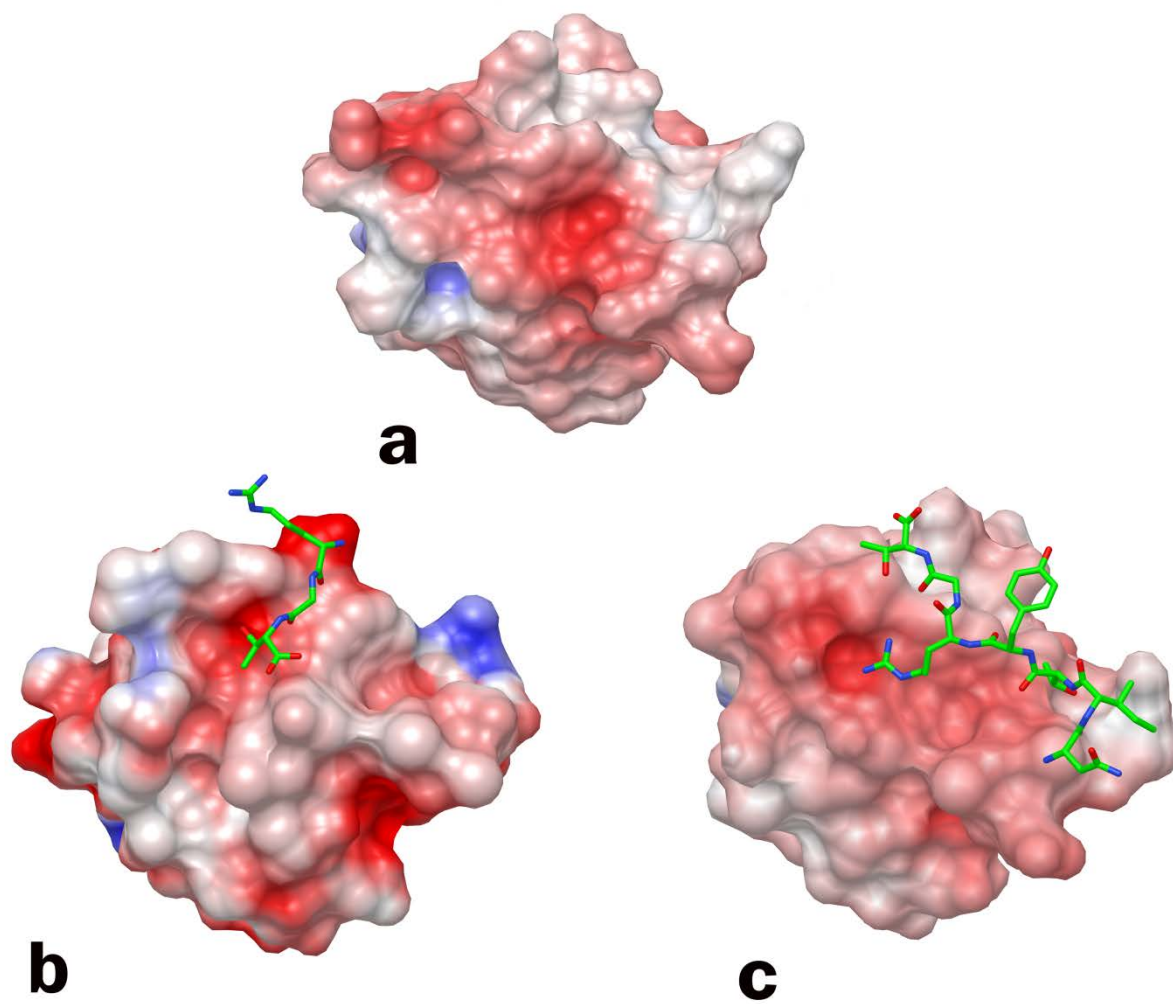

Supplementary Figure 3.

Supplement: pro0022-1358-SD3.pdf [file pro0022-1358-SD3.pdf]
